# Supplementary material for: The biogeography of gastrointestinal mucosal microbiota of beef cattle at harvest
Source: PubMed Central journal article supplement (PMC11663860; doi:10.3389/fmicb.2024.1490882), 2024-12-09
Supplement: Data_Sheet_1.pdf [file Data_Sheet_1.pdf]

1

**Table S1.** Diet composition of all rations fed to cattle on a dry matter basis.

| Ingredient             | Starting Ration, % | Finishing Ration, % |
|------------------------|--------------------|---------------------|
| Corn grain, Flaked     | 28.54              | 54.10               |
| Corn Stalks            | 19.00              | 7.76                |
| Sweetbran <sup>1</sup> | 42.00              | 29.43               |
| Molasses               | 7.00               | 3.49                |
| Corn Oil               | 0.00               | 1.92                |
| Mineral Supplement     | 3.46               | 3.30                |

<sup>1</sup>Cargill Corn Milling

2

3

4

**Table S2.** Classification efficiency by taxonomic rank.

| Rank   | Percentage <sup>1</sup> |
|--------|-------------------------|
| Phylum | 99.35                   |
| Class  | 99.34                   |
| Order  | 99.31                   |
| Family | 99.07                   |
| Genus  | 93.18                   |

<sup>1</sup>Percent of samples after the initial trim which were classified at each taxonomic rank.

5
